# Supplementary material for: Ecosystem-Scale Effects of Nutrients and Fishing on Coral Reefs
Source: Hindawi journal article supplement (doi:10.1155/2011/187248), 2010-12-09
Supplement: f1 [file 187248.f1.pdf]

## Supplemental Methods for Estimating Piecewise Functions

In order to test whether top predator ( $TP$ ) biomass predicts herbivore ( $HE$ ) biomass differently over certain ranges of top predator biomass, I used non-linear least squares to estimate the cut point and then used ordinary least squares to estimate a piecewise function. The model I estimated using non-linear least squares was:

$$HE = (a_1 + b_1 TP) * (TP < c) + (a_1 + b_1 TP + b_2 (TP - c)) * (TP \geq c)$$

where  $a_1$  is the intercept,  $b_1$  and  $b_2$  are slopes, and  $c$  is the unknown cut point. The non-linear least squares estimate of the cut point was 0.81 mT/ha (95% CI: 0.16, 1.44).

I then used the estimate for the cut point to generate a new variable,  $TP_c$  where  $TP_c = TP - c$  if  $TP \geq c$  and  $TP_c = 0$  if  $TP < c$ . This new variable allowed me to estimate the piece wise function:

$$HE = a_2 + b_3 TP + b_4 TP_c$$

where  $a_2$  is the intercept and  $b_3$  and  $b_4$  are slopes. The ordinary least squares estimate of the slope for values of  $TP$  less than the cut point was 0.41 ( $p < 0.01$ ) and for values of  $TP$  greater than or equal to the cut point was -0.10 ( $p = 0.63$ ).

I repeated these methods in order to test whether large-bodied fish biomass predicted small-bodied fish biomass differently over certain ranges of large-bodied fish biomass. The non-linear least squares estimate of the cut point was 2.04 mT/ha (95% CI: 1.16, 2.90). The ordinary least squares estimate of the slope for values of large-bodied fish less than the cut point was 1.07 ( $p < 0.001$ ) and for values of large-bodied fish greater than or equal to the cut point was -0.20 ( $p = 0.61$ ).
