# Supplementary material for: Ecosystem-Scale Effects of Nutrients and Fishing on Coral Reefs
Source: Hindawi journal article supplement (doi:10.1155/2011/187248), 2010-12-09
Supplement: f3 [file 187248.f3.pdf]

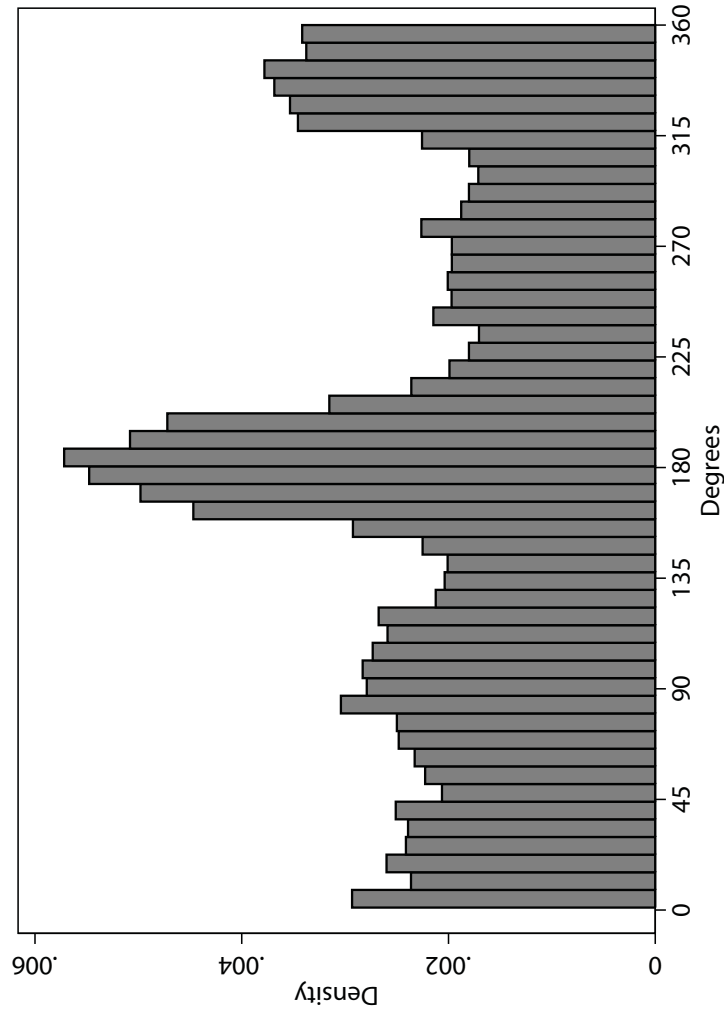

Figure S3. Histogram of mean wave direction from Christmas Island Buoy [48]. Data include waves with periods between 10-50 s during the year 2005. Data from 2005 were analyzed because it was the year closest to 2007 for which data was available during all months.
