# Supplementary material for: Ecosystem-Scale Effects of Nutrients and Fishing on Coral Reefs
Source: Hindawi journal article supplement (doi:10.1155/2011/187248), 2010-12-09
Supplement: f4 [file 187248.f4.pdf]

Table S1. Assignment of benthic organisms to major taxonomic groups

---

|             |                                                                                                                                                               |
|-------------|---------------------------------------------------------------------------------------------------------------------------------------------------------------|
| Coral       | all Scleratinian corals                                                                                                                                       |
| CCA         | all CCA                                                                                                                                                       |
| Turf        | any non-encrusting benthic algae less than ~1 cm in height                                                                                                    |
| Macro-algae | <i>Halimeda</i><br><i>Lobophora</i><br><i>Peyssonellia</i><br>Blue-Green Algae<br>Encrusting Macroalgae<br>Frondose Macroalgae (greater than ~1 cm in height) |
| Other       | <i>Acanthaster</i><br>Anemone<br>Bryozoan<br>Sea Cucumber<br>Soft Coral<br>Sponge<br><i>Tridacna</i><br>Tunicate<br>Urchin<br>Zooanthid                       |

---
