# Supplementary material for: Ecosystem-Scale Effects of Nutrients and Fishing on Coral Reefs
Source: Hindawi journal article supplement (doi:10.1155/2011/187248), 2010-12-09
Supplement: f5 [file 187248.f5.pdf]

Table S2. Assignment of fish species to major trophic groups

---

Top Predators

*Aphareus furca*  
*Aprion virescens*  
*Carangoides orthogrammus*  
*Caranx ignobilis*  
*Caranx melampygus*  
*Carcharhinus amblyrhynchos*  
*Cephalopholis argus*  
*Cephalopholis leopardus*  
*Cephalopholis miniata*  
*Cephalopholis urodeta*  
*Elagatis bipinnulata*  
*Epinephelus fasciatus*  
*Epinephelus hexagonatus*  
*Epinephelus macrospilos*  
*Epinephelus melanostigma*  
*Epinephelus polyphekadion*  
*Epinephelus spilotoceps*  
*Epinephelus sp.*  
*Fistularia commersonii*  
*Gracila albomarginata*  
*Gymnothorax sp.*  
*Gymnosarda unicolor*  
*Gymnothorax undulates*  
*Lethrinus olivaceus*  
*Lethrinus xanthochilus*  
*Lujanus monostigma*  
*Lutjanus bohar*  
*Lutjanus fulvus*  
*Lutjanus gibbus*  
*Lutjanus kasmira*  
*Oxycheilinus unifasciatus*  
*Paracirrhites forsteri*  
*Paracirrhites hemistictus*  
*Scomberoides lysan*  
*Sphyraena sp.*  
*Synodus jaculum*  
*Triaenodon obesus*  
*Variola louti*

Carnivores

*Anampses caeruleopunctatus*  
*Anampses melanurus*  
*Anampses twistii*  
*Arothron hispidus*

*Arothron meleagris*  
*Balistapus undulatus*  
*Balistoides viridescens*  
*Bodianus axillaris*  
*Bodianus bilunulatus*  
*Bodianus loxozonus*  
*Bodianus prognathus*  
*Cantherhines dumerlii*  
*Canthigaster janthinoptera*  
*Canthigaster solandri*  
*Chaetodon auriga*  
*Chaetodon bennetti*  
*Chaetodon ephippium*  
*Chaetodon lineolatus*  
*Chaetodon lunula*  
*Chaetodon meyeri*  
*Chaetodon ornatissimus*  
*Chaetodon quadrimaculatus*  
*Chaetodon trifascialis*  
*Chaetodon ulietensis*  
*Chaetodon unimaculatus*  
*Cheilinus trilobatus*  
*Cheilinus undulatus*  
*Cirrhitichthys oxycephalus*  
*Coris aygula*  
*Coris centralis*  
*Coris gaimard*  
*Epibulus insidiator*  
*Forcipiger flavissimus*  
*Gnathodentex aureolineatus*  
*Gobiid sp.*  
*Gomphosus varius*  
*Halichoeres hortulanus*  
*Halichoeres margaritaceus*  
*Halichoeres melasmapomus*  
*Halichoeres ornatissimus*  
*Halichoeres pallidus*  
*Hemigymnus fasciatus*  
*Labroides bicolor*  
*Labroides dimidiatus*  
*Labroides rubrolabiatus*  
*Labrichthys unilineatus*  
*Macropharyngodon meleagris*  
*Malacanthus latovittatus*  
*Monotaxis grandoculis*  
*Mulloidichthys flavolineatus*

*Mulloidichthys mimicus*  
*Neoniphon sammara*  
*Novaculichthys taeniourus*  
*Ostracion meleagris*  
*Paracirrhites arcatus*  
*Parupeneus barberinus*  
*Parupeneus cyclostomus*  
*Parupeneus insularis*  
*Parupeneus multifasciatus*  
*Parupeneus sp.*  
*Plectroglyphidodon dickii*  
*Plectroglyphidodon imparipennis*  
*Plectroglyphidodon johnstonianus*  
*Plectroglyphidodon phoenixensis*  
*Pomacanthus imperator*  
*Pseudobalistes flavimarginatus*  
*Pseudocheilinus hexataenia*  
*Pseudocheilinus octotaenia*  
*Sargocentron caudimaculatum*  
*Sebastapistes cyanostigma*  
*Stethojulis bandanensis*  
*Sufflamen bursa*  
*Sufflamen chrysopterum*  
*Sufflamen fraenatum*  
*Thalassoma lunare*  
*Thalassoma lutescens*  
*Thalassoma quinquevittatum*  
*Thalassoma trilobatum*  
*Valenciennesia strigata*  
*Zanclus cornutus*

#### Herbivores

*Acanthurus achilles*  
*Acanthurus blochii*  
*Acanthurus dussumieri*  
*Acanthurus guttatus*  
*Acanthurus leucochilus*  
*Acanthurus lineatus*  
*Acanthurus nigricans*  
*Acanthurus nigricauda*  
*Acanthurus nigrofuscus*  
*Acanthurus olivaceus*  
*Acanthurus sp.*  
*Calotomus carolinus*  
*Centropyge flavissima*  
*Centropyge loricula*

*Chlorurus sordidus*  
*Cirripectes sp.*  
*Ctenochaetus cyanocheilus*  
*Ctenochaetus flavicauda*  
*Ctenochaetus hawaiiensis*  
*Ctenochaetus marginatus*  
*Ctenochaetus striatus*  
*Scarus frenatus*  
*Scarus ghobban*  
*Scarus globiceps*  
*Scarus niger*  
*Scarus oviceps*  
*Scarus psittacus*  
*Scarus rubroviolaceus*  
*Scarus sp.*  
*Scarus tricolor*  
*Stegastes aureus*  
*Stegastes fasciolatus*  
*Zebrasoma rostratum*  
*Zebrasoma veliferum*

Planktivores

*Caesio teres*  
*Chaetodon kleinii*  
*Chanos chanos*  
*Chromis acares*  
*Chromis margaritifer*  
*Chromis vanderbilti*  
*Chromis xanthura*  
*Cirrhilabrus exquisitus*  
*Dascyllus auripinnis*  
*Decapterus macarellus*  
*Heniochus acuminatus*  
*Lepidozygus tapeinosoma*  
*Luzonichthys whitleyi*  
*Manta birostris*  
*Melichthys niger*  
*Melichthys vidua*  
*Myripristis adusta*  
*Myripristis amaena*  
*Myripristis berndti*  
*Odonus niger*  
*Ostorhinchus angustatus*  
*Ostorhinchus apogonides*  
*Pempheris oualensis*  
*Plagiotremus rhinorhynchus*

*Plagiotremus tapeinosoma*  
*Plagiotremus sp.*  
*Pomacentrus coelestis*  
*Pseudanthias bartlettorum*  
*Pseudanthias cooperi*  
*Pseudanthias dispar*  
*Pseudanthias olivaceus*  
*Ptereleotris microlepis*  
*Ptereleotris zebra*  
*Pterocaesio lativittata*  
*Pterocaesio tile*  
*Thalassoma amblycephalum*
