# Supplementary material for: Ecosystem-Scale Effects of Nutrients and Fishing on Coral Reefs
Source: Hindawi journal article supplement (doi:10.1155/2011/187248), 2010-12-09
Supplement: f6 [file 187248.f6.pdf]

Table S3. Test of independence for response variables within each treatment in the natural factorial experiment and across all sites. The unit of measure for abundance of benthic taxonomic groups is percent cover and for fish trophic groups is mT ha<sup>-1</sup>.

| Dependent                      | Moran's I |          |      |         |
|--------------------------------|-----------|----------|------|---------|
|                                | Expected  | Observed | SD   | p-value |
| <i>Low Fishing, Low Chla</i>   |           |          |      |         |
| Coral                          | -0.2      | -0.18    | 0.19 | 0.92    |
| CCA                            | -0.2      | -0.46    | 0.22 | 0.23    |
| Macroalgae                     | -0.2      | -0.6     | 0.29 | 0.17    |
| Turf                           | -0.2      | -0.11    | 0.18 | 0.63    |
| Top Predators                  | -0.2      | -0.03    | 0.17 | 0.32    |
| Carnivores                     | -0.2      | -0.41    | 0.26 | 0.44    |
| Planktivores                   | -0.2      | -0.25    | 0.19 | 0.78    |
| Herbivores                     | -0.2      | -0.41    | 0.27 | 0.44    |
| <i>High Fishing, Low Chla</i>  |           |          |      |         |
| Coral                          | -0.2      | -0.18    | 0.17 | 0.90    |
| CCA                            | -0.2      | 0.09     | 0.16 | 0.07    |
| Macroalgae                     | -0.2      | -0.28    | 0.15 | 0.60    |
| Turf                           | -0.2      | -0.07    | 0.19 | 0.48    |
| Top Predators                  | -0.2      | -0.05    | 0.15 | 0.31    |
| Carnivores                     | -0.2      | -0.02    | 0.18 | 0.24    |
| Planktivores                   | -0.2      | -0.05    | 0.18 | 0.40    |
| Herbivores                     | -0.2      | 0.20     | 0.18 | 0.03    |
| <i>High Fishing, High Chla</i> |           |          |      |         |
| Coral                          | -0.2      | -0.02    | 0.21 | 0.38    |
| CCA                            | -0.2      | -0.04    | 0.15 | 0.29    |
| Macroalgae                     | -0.2      | -0.09    | 0.18 | 0.54    |
| Turf                           | -0.2      | -0.31    | 0.18 | 0.55    |
| Top Predators                  | -0.2      | 0.17     | 0.19 | 0.051   |
| Carnivores                     | -0.2      | -0.10    | 0.12 | 0.42    |
| Planktivores                   | -0.2      | -0.05    | 0.10 | 0.15    |
| Herbivores                     | -0.2      | -0.07    | 0.18 | 0.47    |
| <i>Low Fishing, High Chla</i>  |           |          |      |         |
| Coral                          | -0.2      | -0.12    | 0.13 | 0.54    |
| CCA                            | -0.2      | -0.30    | 0.13 | 0.41    |
| Macroalgae                     | -0.2      | -0.02    | 0.13 | 0.16    |
| Turf                           | -0.2      | -0.28    | 0.08 | 0.34    |
| Top Predators                  | -0.2      | -0.17    | 0.06 | 0.58    |
| Carnivores                     | -0.2      | -0.20    | 0.06 | 0.96    |
| Planktivores                   | -0.2      | -0.29    | 0.06 | 0.46    |
| Herbivores                     | -0.2      | -0.25    | 0.11 | 0.64    |
| <i>All Sites</i>               |           |          |      |         |
| Coral                          | -0.03     | 0.12     | 0.07 | 0.03    |
| CCA                            | -0.03     | 0.31     | 0.07 | <0.001  |
| Macroalgae                     | -0.03     | 0.21     | 0.07 | <0.001  |
| Turf                           | -0.03     | 0.17     | 0.07 | 0.004   |

|               |       |       |      |        |
|---------------|-------|-------|------|--------|
| Top Predators | -0.03 | 0.21  | 0.06 | <0.001 |
| Carnivores    | -0.03 | -0.10 | 0.03 | 0.66   |
| Planktivores  | -0.03 | 0.12  | 0.06 | 0.016  |
| Herbivores    | -0.03 | 0.11  | 0.07 | 0.01   |

---
