# Supplementary material for: Ecosystem-Scale Effects of Nutrients and Fishing on Coral Reefs
Source: Hindawi journal article supplement (doi:10.1155/2011/187248), 2010-12-09
Supplement: f7 [file 187248.f7.pdf]

Table S4. Two-way ANOVA comparing effects of fishing and chlorophyll-*a* on fish biomass.

| Source                | df | SS     | F    | p     | % variance explained |
|-----------------------|----|--------|------|-------|----------------------|
| <b>Top Predators</b>  |    |        |      |       |                      |
| Fishing               | 1  | 8.821  | 8.37 | 0.009 | 22.3                 |
| Chlorophyll- <i>a</i> | 1  | 2.304  | 2.19 | 0.155 | 3.6                  |
| Interaction           | 1  | 1.197  | 1.14 | 0.299 | 0.4                  |
| Residual              | 20 | 21.084 |      |       |                      |
| Total                 | 23 | 33.400 |      |       |                      |
| <b>Carnivores</b>     |    |        |      |       |                      |
| Fishing               | 1  | 2.933  | 7.80 | 0.011 | 22.8                 |
| Chlorophyll- <i>a</i> | 1  | 0.174  | 0.46 | 0.504 | 0                    |
| Interaction           | 1  | 0.179  | 0.48 | 0.500 | 0                    |
| Residual              | 20 | 7.524  |      |       |                      |
| Total                 | 23 | 10.810 |      |       |                      |
| <b>Planktivores</b>   |    |        |      |       |                      |
| Fishing               | 1  | 5.680  | 4.54 | 0.046 | 10.0                 |
| Chlorophyll- <i>a</i> | 1  | 11.498 | 9.19 | 0.007 | 23.1                 |
| Interaction           | 1  | 0.361  | 0.29 | 0.597 | 0                    |
| Residual              | 20 | 25.024 |      |       |                      |
| Total                 | 23 | 42.563 |      |       |                      |
| <b>Herbivores</b>     |    |        |      |       |                      |
| Fishing               | 1  | 0.044  | 1.22 | 0.283 | 1.0                  |
| Chlorophyll- <i>a</i> | 1  | 0.033  | 0.92 | 0.349 | 0                    |
| Interaction           | 1  | 0.020  | 0.54 | 0.470 | 0                    |
| Residual              | 20 | 0.720  |      |       |                      |
| Total                 | 23 | 0.816  |      |       |                      |
