# Supplementary material for: Ecosystem-Scale Effects of Nutrients and Fishing on Coral Reefs
Source: Hindawi journal article supplement (doi:10.1155/2011/187248), 2010-12-09
Supplement: f8 [file 187248.f8.pdf]

Table S5. Two-way ANOVA comparing effects of fishing and chlorophyll-*a* on benthic taxonomic group percent cover.

| Source                | df | SS    | F     | p      | % variance explained |
|-----------------------|----|-------|-------|--------|----------------------|
| <b>Coral</b>          |    |       |       |        |                      |
| Fishing               | 1  | 0.000 | 0.00  | 0.977  | 0                    |
| Chlorophyll- <i>a</i> | 1  | 0.028 | 1.75  | 0.201  | 3.3                  |
| Interaction           | 1  | 0.000 | 0.05  | 0.821  | 0                    |
| Residual              | 20 | 0.315 |       |        |                      |
| Total                 | 23 | 0.344 |       |        |                      |
| <b>CCA</b>            |    |       |       |        |                      |
| Fishing               | 1  | 0.015 | 0.98  | 0.335  | 0                    |
| Chlorophyll- <i>a</i> | 1  | 0.279 | 17.56 | <0.001 | 40.0                 |
| Interaction           | 1  | 0.029 | 1.84  | 0.190  | 2.0                  |
| Residual              | 20 | 0.318 |       |        |                      |
| Total                 | 23 | 0.641 |       |        |                      |
| <b>Turf</b>           |    |       |       |        |                      |
| Fishing               | 1  | 0.001 | 0.04  | 0.838  | 3.1                  |
| Chlorophyll- <i>a</i> | 1  | 0.219 | 10.24 | 0.004  | 34.1                 |
| Interaction           | 1  | 0.035 | 1.66  | 0.212  | 8.1                  |
| Residual              | 20 | 0.427 |       |        |                      |
| Total                 | 23 | 0.683 |       |        |                      |
| <b>Macroalgae</b>     |    |       |       |        |                      |
| Fishing               | 1  | 0.049 | 4.86  | 0.039  | 10.3                 |
| Chlorophyll- <i>a</i> | 1  | 0.112 | 11.06 | 0.003  | 26.9                 |
| Interaction           | 1  | 0.005 | 0.51  | 0.483  | 0                    |
| Residual              | 20 | 0.203 |       |        |                      |
| Total                 | 23 | 0.370 |       |        |                      |
