# Supplementary material for: Ecosystem-Scale Effects of Nutrients and Fishing on Coral Reefs
Source: Hindawi journal article supplement (doi:10.1155/2011/187248), 2010-12-09
Supplement: f9 [file 187248.f9.pdf]

Table S6. Models of the effect of herbivores ( $\text{mT ha}^{-1}$ ) and chlorophyll-*a* ( $\text{mg m}^{-3}$ ) on the percent cover of benthic taxonomic groups. All predictor are random variables and models were estimated using ordinary least squares. However, if residuals exhibited spatial autocorrelation, relationships were estimated using spatial simultaneous autoregressive linear models (indicated by \*).

| Dependent  | Predictors  |       |              | AIC <sub>c</sub> | $\Delta \text{AIC}_c$ | w <sub>i</sub> |
|------------|-------------|-------|--------------|------------------|-----------------------|----------------|
| Coral      | Herbivores  | Chla  | Interaction  | -30.05           | 1.43                  | 0.12           |
|            | Herbivores  | Chla  |              | -31.48           | 0                     | 0.25           |
|            | Herbivores* |       |              | -31.04           | 0.44                  | 0.20           |
|            |             | Chla* |              | -28.38           | 3.10                  | 0.05           |
|            | Herbivores  |       | Interaction  | -30.63           | 0.85                  | 0.16           |
|            |             | Chla  | Interaction  | -31.01           | 0.47                  | 0.20           |
| CCA        | Herbivores  | Chla  | Interaction* | -31.02           | 2.98                  | 0.07           |
|            | Herbivores  | Chla* |              | -33.11           | 0.88                  | 0.19           |
|            | Herbivores* |       |              | -34.00           | 0                     | 0.29           |
|            |             | Chla* |              | -29.35           | 4.65                  | 0.03           |
|            | Herbivores  |       | Interaction* | -33.88           | 0.12                  | 0.28           |
|            |             | Chla  | Interaction* | -32.56           | 1.44                  | 0.14           |
| Turf       | Herbivores  | Chla  | Interaction* | -23.03           | 2.61                  | 0.07           |
|            | Herbivores  | Chla  |              | -25.04           | 0.60                  | 0.19           |
|            | Herbivores* |       |              | -25.50           | 0.14                  | 0.24           |
|            |             | Chla  |              | -22.24           | 3.40                  | 0.05           |
|            | Herbivores  |       | Interaction* | -25.64           | 0                     | 0.26           |
|            |             | Chla  | Interaction  | -25.10           | 0.54                  | 0.19           |
| Macroalgae | Herbivores  | Chla  | Interaction  | -110.93          | 0                     | 0.98           |
|            | Herbivores  | Chla  |              | -100.63          | 10.30                 | <0.01          |
|            | Herbivores* |       |              | -89.91           | 21.02                 | <0.01          |
|            |             | Chla  |              | -101.79          | 9.14                  | 0.01           |
|            | Herbivores  |       | Interaction  | -91.40           | 19.42                 | <0.01          |
|            |             | Chla  | Interaction  | -101.51          | 9.42                  | <0.01          |
