# Supplementary material for: Ecosystem-Scale Effects of Nutrients and Fishing on Coral Reefs
Source: Hindawi journal article supplement (doi:10.1155/2011/187248), 2010-12-09
Supplement: f10 [file 187248.f10.pdf]

Table S7. Estimates of the effect of herbivores, chlorophyll-*a* and/or their interaction on benthic taxonomic groups from the best candidate models (see Table S6). All predictor are random variables and models were estimated using ordinary least squares. However, if residuals exhibited spatial autocorrelation, relationships were estimated using spatial simultaneous autoregressive linear models (indicated by \*)

| Dependent Variable | Predictor Variable | Coefficient | S.E. | p-value |
|--------------------|--------------------|-------------|------|---------|
| Coral              | Model 1            |             |      |         |
|                    | Herbivores         | -0.22       | 0.11 | 0.065   |
|                    | Chla               | -1.15       | 1.06 | 0.287   |
|                    | Constant           | 0.64        | 0.23 | 0.008   |
| CCA                | Model 1*           |             |      |         |
|                    | Herbivores         | 0.27        | 0.10 | 0.009   |
|                    | Constant           | 0.16        | 0.06 | 0.012   |
|                    | Model 2*           |             |      |         |
|                    | Herbivores         | 1.03        | 0.44 | 0.019   |
|                    | Herbivores*Chla    | -3.91       | 2.23 | 0.080   |
|                    | Constant           | 0.15        | 0.06 | 0.010   |
| Turf               | Model 1*           |             |      |         |
|                    | Herbivores         | -0.82       | 0.52 | 0.117   |
|                    | Herbivores*Chla    | 4.64        | 2.62 | 0.077   |
|                    | Constant           | 0.21        | 0.07 | 0.002   |
|                    | Model 2*           |             |      |         |
|                    | Herbivores         | 0.09        | 0.11 | 0.424   |
|                    | Constant           | 0.20        | 0.07 | 0.007   |
| Macroalgae         | Model 1            |             |      |         |
|                    | Herbivores         | 1.31        | 0.37 | 0.001   |
|                    | Chla               | 4.85        | 0.94 | 0.000   |
|                    | Herbivores*Chla    | -6.97       | 1.88 | 0.001   |
|                    | Constant           | -0.83       | 0.19 | 0.000   |
